# Supplementary material for: Ultrasmall Pt NPs-modified flasklike colloidal motors with high mobility and enhanced ion tolerance
Source: Royal Society of Chemistry journal article supplement (doi:10.1039/d3nr02664g), 2023-01-01
Supplement: d3nr02664g1.pdf [file d3nr02664g1.pdf]

## Supporting Information

### Ultrasmall Pt NPs-modified Flasklike Colloidal Motors with High Mobility and Enhanced Ion Tolerance

*Shurui Yuan,<sup>a</sup> Ling Yang,<sup>b</sup> Xiankun Lin<sup>\*a</sup> and Qiang He<sup>\*a</sup>*

a. School of Medicine and Health, Harbin Institute of Technology, Yi  
Kuang Jie 2, Harbin 150080, China.

b. Wenzhou Institute, University of Chinese Academy of Sciences,  
Wenzhou 325000, China.

E-mail: xiankunlin@hit.edu.cn; qianghe@hit.edu.cn

Video S1: The quasi-linear motion of Pt-FCMs in 5% H<sub>2</sub>O<sub>2</sub>.

Video S2: The quasi-circular motion of Pt-FCMs in 5% H<sub>2</sub>O<sub>2</sub>.

Video S3: The motion of Pt-FCMs in 50% fetal bovine serum containing  
5% H<sub>2</sub>O<sub>2</sub>.

Video S4: The motion of Pt-FCMs in 5% H<sub>2</sub>O<sub>2</sub> with CTAB.

Video S5: The motion of Pt-FCMs in 5% H<sub>2</sub>O<sub>2</sub> with SDS.

Table S1: Summary of chemically powered flasklike colloidal motors

| Materials                    | Shape        | Size (nm) | Propulsion mechanism                        | Fuel                          | $V$ ( $\mu\text{m/s}$ ) or $D$ ( $\mu\text{m}^2/\text{s}$ ) | Velocity in bodylengths per second | Ref.      |
|------------------------------|--------------|-----------|---------------------------------------------|-------------------------------|-------------------------------------------------------------|------------------------------------|-----------|
| Pt/carbonaceous              | Flask        | 766       | Self-diffusiophoresis                       | 5% $\text{H}_2\text{O}_2$     | 23.32 $\mu\text{m/s}$                                       | 30                                 | This work |
| Pt/carbonaceous              | Flask        | 850       | Bubble propulsion                           | 5% $\text{H}_2\text{O}_2$     | 15 $\mu\text{m/s}$                                          | 17.6                               | 22        |
| Pt/carbonaceous              | Flask        | 1080      | Self-diffusiophoresis or bubble propulsion  | 5% $\text{H}_2\text{O}_2$     | 18.81 $\mu\text{m/s}$                                       | 17.41                              | 23        |
| Enzyme/carbonaceous          | Flask        | 844       | Self-diffusiophoresis                       | 400 mM glucose                | 3.89 $\mu\text{m/s}$                                        | 4.6                                | 28        |
| Pt/ $\text{SiO}_2$           | Flask        | 720       | Bubble propulsion                           | 5% $\text{H}_2\text{O}_2$     | 18.2 $\mu\text{m}^2/\text{s}$ ( $D$ )                       | \                                  | 29        |
| Pt/ $\text{SiO}_2$           | Flask        | 350       | Bubble propulsion                           | 3% $\text{H}_2\text{O}_2$     | 68.8 $\mu\text{m/s}$                                        | 196                                | 30        |
| Enzyme-Au/ $\text{SiO}_2$    | Tadpole-like | 320       |                                             | 1.5% $\text{H}_2\text{O}_2$   | 3.11 $\mu\text{m}^2/\text{s}$ ( $D$ )                       | \                                  | 31        |
| Pt/polymersomes              | Stomatocyte  | 152       | Self-diffusiophoresis and bubble propulsion | 0.35% $\text{H}_2\text{O}_2$  | 23 $\mu\text{m/s}$                                          | 151                                | 32        |
| Pt/polymersomes              | Stomatocyte  | 341       | Self-diffusiophoresis and bubble propulsion | 0.017% $\text{H}_2\text{O}_2$ | 35 $\mu\text{m/s}$ (30°C)                                   | 102                                | 33        |
| $\text{MnO}_2$ /polymersomes | Stomatocyte  | ca.400    | Bubble propulsion                           | 0.17% $\text{H}_2\text{O}_2$  | 20 $\mu\text{m/s}$                                          | 50                                 | 34        |
